# Supplementary material for: Exciton dynamics of an aggregation-induced delayed fluorescence emitter in non-doped OLEDs and its application as host for high-efficiency red phosphorescent OLEDs
Source: Royal Society of Chemistry journal article supplement (doi:10.1039/d3cp03275b), 2023-01-01
Supplement: d3cp03275b1.pdf [file d3cp03275b1.pdf]

## Supporting Information

**Exciton dynamics of an aggregation-induced delayed fluorescence emitter in non-doped OLEDs and its application as host for high efficiency red phosphorescent OLEDs**

Hanlin Li<sup>1</sup>, Chengwei Lin<sup>1</sup>, Yibing Wu<sup>1</sup>, Xianfeng Qiao<sup>1</sup>, Dezhi Yang<sup>1</sup>, Yanfeng Dai<sup>1</sup>, Qian Sun<sup>1</sup>, Tansir Ahamad<sup>2</sup>, Zhujin Zhao<sup>1\*</sup>, and Dongge Ma<sup>1\*</sup>

<sup>1</sup>Institute of Polymer Optoelectronic Materials and Devices, Guangdong Provincial Key Laboratory of Luminescence from Molecular Aggregates, Guangdong-Hong Kong-Macao Joint Laboratory of Optoelectronic and Magnetic Functional Materials, State Key Laboratory of Luminescent Materials and Devices, South China University of Technology, Guangzhou 510640, China

<sup>2</sup>Department of Chemistry, College of Science, King Saud University, Riyadh 11451, Saudi Arabia,

E-mail: [msdgma@scut.edu.cn](mailto:msdgma@scut.edu.cn), [mszjzhao@scut.edu.cn](mailto:mszjzhao@scut.edu.cn)

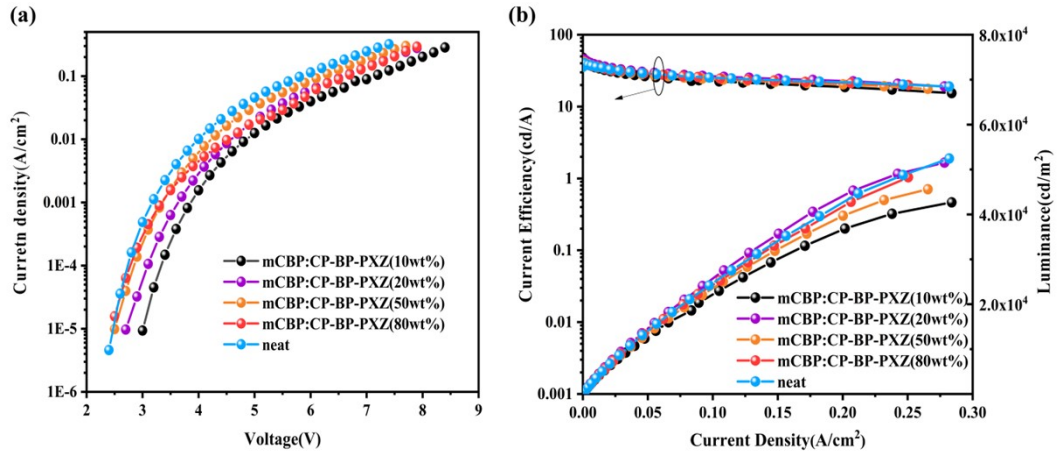

**Figure S1.** (a) Current density-voltage characteristics of the fabricated OLEDs with different CP-BP-PXZ doping concentrations in mCBP. (b) Current efficiency–luminance-current density characteristics of the fabricated OLEDs with different CP-BP-PXZ doping concentrations in mCBP.

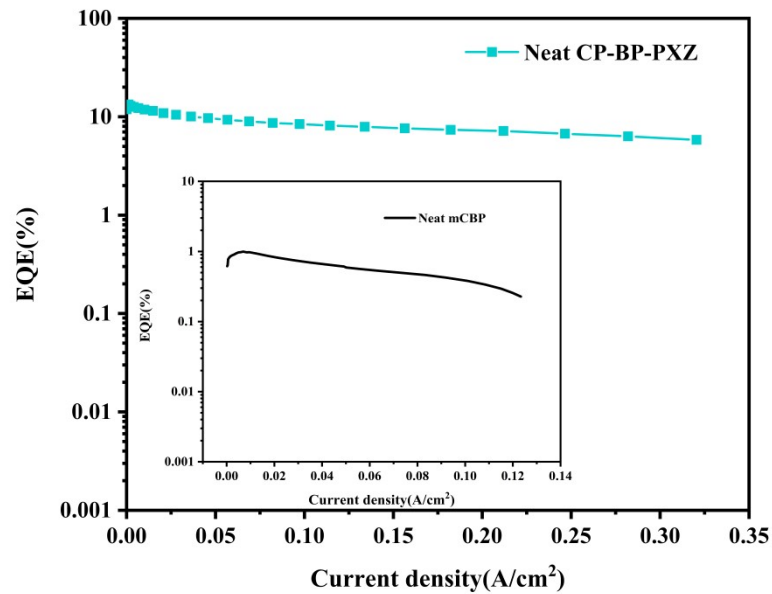

**Figure S2.** EQE characteristics of the two non-doped OLEDs with different emitters of neat mCBP and CP-BP-PXZ.

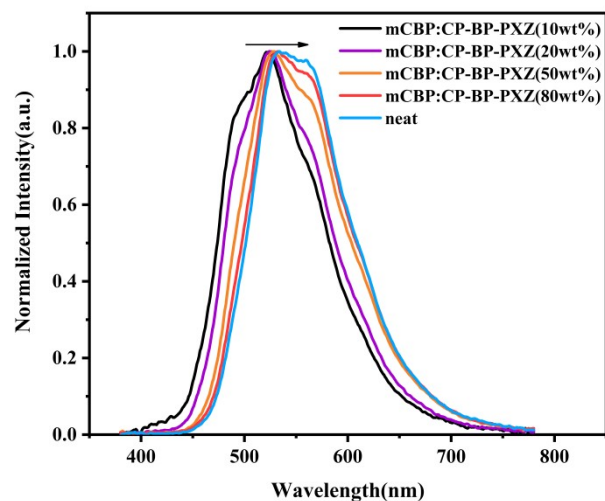

**Figure S3.** Normalized electroluminescence spectra of the resulting OLEDs with different CP-BP-PXZ doping concentrations in mCBP.

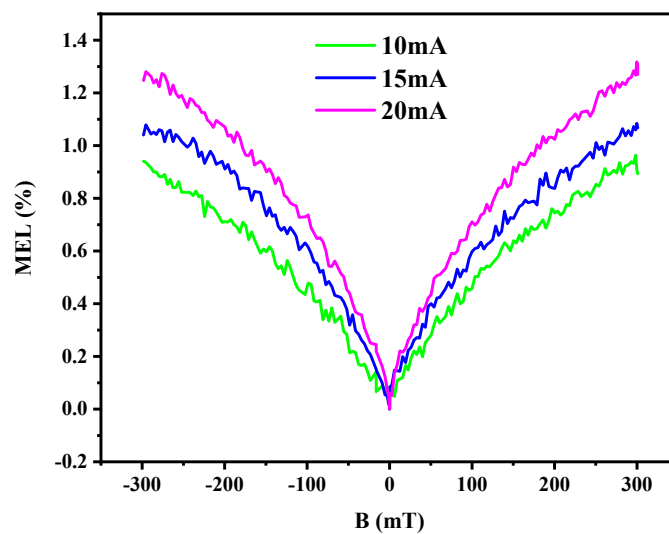

**Figure S4.** MEL responses of the non-doped OLED based on CP-BP-PXZ under different applied currents.

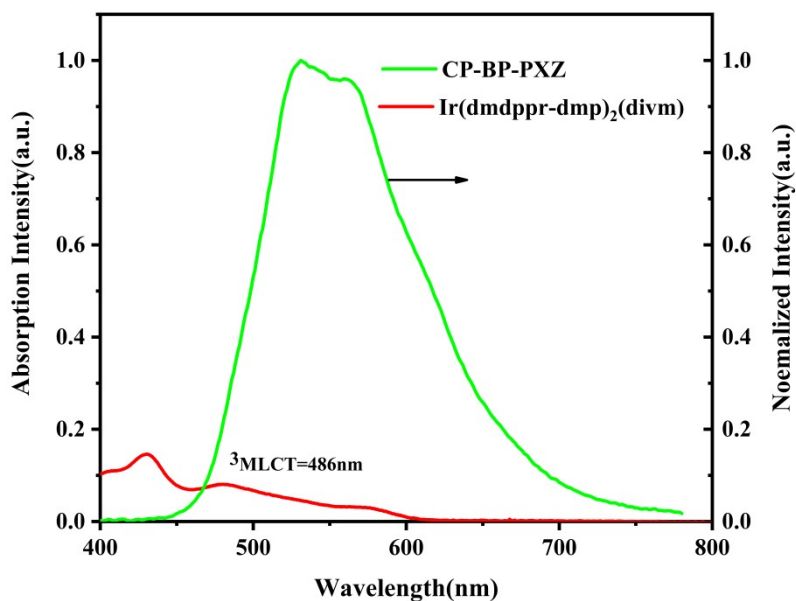

**Figure S5.** Absorption spectrum of  $\text{Ir}(\text{dmdppr-dmp})_2(\text{divm})$  and emission spectrum of CP-BP-PXZ.

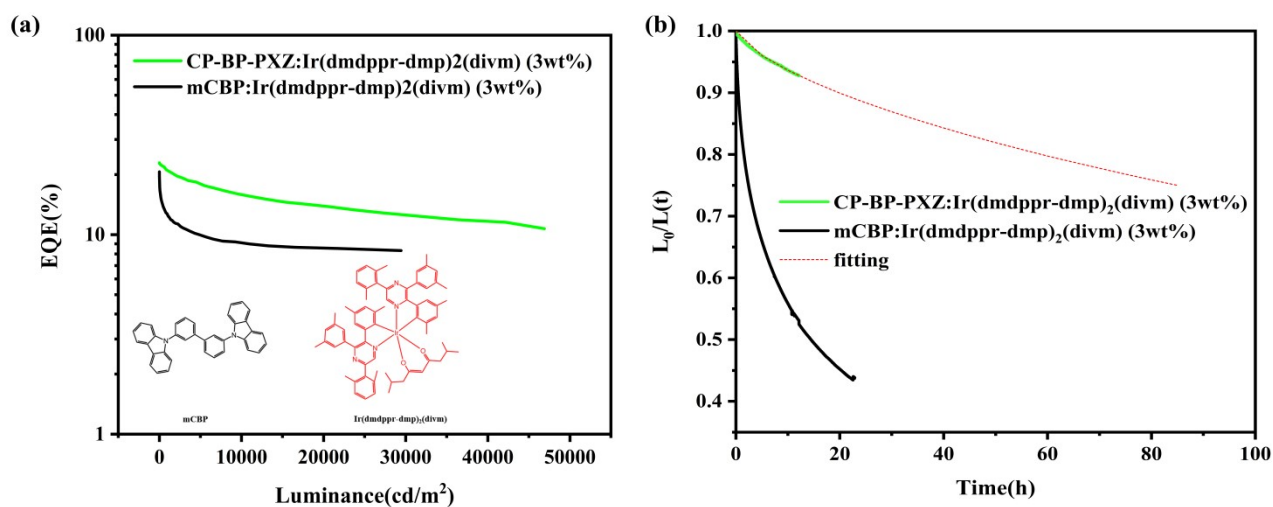

**Figure S6.** (a) EQE - luminance characteristics of the resulting red phosphorescent OLEDs based on CP-BP-PXZ and mCBP as host. The insert is the chemical structure of mCBP and  $\text{Ir}(\text{dmdppr-dmp})_2(\text{divm})$ . (b) Lifetime comparison of the resulting red phosphorescent OLEDs based on CP-BP-PXZ and mCBP as host at the initial luminance of  $500 \text{ cd/m}^2$ .

**Table S1. Summary of EL performances of the OLEDs with different CP-BP-PXZ doping concentrations in mCBP host.**

| Doping Concentration | V <sub>on</sub> (V) | L <sub>Max</sub> (cd/m <sup>2</sup> ) | CE (cd/A) | PE (lm/W) | EQE/EQE <sup>a</sup> (%) | k <sub>STA</sub> (cm <sup>3</sup> /s) | k <sub>TTA</sub> (cm <sup>3</sup> /s) | CIE <sup>b</sup> |
|----------------------|---------------------|---------------------------------------|-----------|-----------|--------------------------|---------------------------------------|---------------------------------------|------------------|
| 10wt%                | 3                   | 42674                                 | 47.76     | 48.50     | 16.24/13.98              | 1.52*10 <sup>-13</sup>                | 6.49*10 <sup>-14</sup>                | (0.31,0.51)      |
| 20wt%                | 2.7                 | 51536                                 | 45.55     | 44.31     | 15.30/14.10              | 1.00*10 <sup>-15</sup>                | 3.24*10 <sup>-14</sup>                | (0.33,0.53)      |
| 50wt%                | 2.5                 | 46699                                 | 41.98     | 42.56     | 13.83/12.95              | 3.59*10 <sup>-15</sup>                | 3.67*10 <sup>-14</sup>                | (0.37,0.54)      |
| 80wt%                | 2.5                 | 50069                                 | 40.06     | 42.58     | 13.23/12.59              | 2.06*10 <sup>-14</sup>                | 2.69*10 <sup>-14</sup>                | (0.39,0.54)      |
| neat                 | 2.4                 | 54830                                 | 40.31     | 47.28     | 13.31/12.80              | 2.42*10 <sup>-14</sup>                | 3.45*10 <sup>-14</sup>                | (0.39,0.54)      |

a.EQE at 1000cd/m<sup>2</sup> ;b.the CIE coordinates at 6 V

**Table S2. Calculations of the rate constants of CP-BP-PXZ doped mCBP host with different doping concentrations.**

| Doping Concentration(wt%) | τ <sub>p</sub> (ns) | τ <sub>d</sub> (μs) | k <sub>s</sub> <sup>r</sup> (10 <sup>7</sup> s <sup>-1</sup> ) | k <sub>ISC</sub> (10 <sup>7</sup> s <sup>-1</sup> ) | k <sub>RISC</sub> (10 <sup>6</sup> s <sup>-1</sup> ) |
|---------------------------|---------------------|---------------------|----------------------------------------------------------------|-----------------------------------------------------|------------------------------------------------------|
| 10wt%                     | 20.8                | 1.49                | 2.71                                                           | 2.09                                                | 1.18                                                 |
| 20wt%                     | 25                  | 1.07                | 1.28                                                           | 3.25                                                | 3.29                                                 |
| 50wt%                     | 25                  | 1.04                | 1.24                                                           | 2.75                                                | 3.06                                                 |
| 80wt%                     | 25                  | 0.93                | 1.37                                                           | 2.62                                                | 3.09                                                 |
| Neat                      | 26                  | 0.87                | 1.41                                                           | 2.43                                                | 3.13                                                 |

|          | Host          | Dopant<br>Concentration | V <sub>on</sub> (V) | EQE(%) | EQE <sup>a</sup> (%) | CIE <sup>b</sup> |
|----------|---------------|-------------------------|---------------------|--------|----------------------|------------------|
| Device 1 | CP-BP-<br>PXZ | 1wt%                    | 2.4                 | 17.6   | 16.3                 | (0.48,0.47)      |
| Device 2 | CP-BP-<br>PXZ | 2wt%                    | 2.4                 | 21.7   | 20.1                 | (0.60,0.38)      |
| Device 3 | CP-BP-<br>PXZ | 3wt%                    | 2.4                 | 23.0   | 21.2                 | (0.64,0.34)      |
| Device 4 | CP-BP-<br>PXZ | 5wt%                    | 2.4                 | 16.0   | 13.9                 | (0.66,0.33)      |
| Device 5 | mCBP          | 3wt%                    | 3.2                 | 20.6   | 12.3                 | (0.64,0.33)      |

a. at 1000cd/m<sup>2</sup>; b. the CIE coordinates at 6 V

**Table S3.** EL performance summary of the fabricated red phosphorescent OLEDs based on CP-BP-PXZ as host

**The photophysical parameters are calculated by the following functions<sup>1, 2</sup>:**

$$k_F = \Phi_{\text{prompt}}/\tau_{\text{prompt}}$$

$$k_p = 1/\tau_{\text{prompt}}; k_d = 1/\tau_{\text{delayed}}$$

$$k_p = k_F + k_{\text{ISC}}$$

$$k_p k_d = k_F k_{\text{RISC}}$$

$$k_{\text{ISC}} = k_p - k_F = k_p (1 - \Phi_{\text{prompt}})$$

$$k_{\text{RISC}} = (k_p k_d)/(k_p - k_{\text{ISC}})$$

### **The carrier kinetics**

As hole and electron transport and recombination on CP-BP-PXZ in non-doped OLED, the free carriers can be described as following equations<sup>3</sup>

$$\frac{dn_h}{dt} \cong \frac{jh}{eL_h} - \gamma n^2$$

$$\frac{dn_e}{dt} \cong \frac{je}{eL_e} - \gamma n^2$$

where the  $\gamma$  is the bimolecular recombination coefficient,  $j^h$  and  $j^e$  are the hole and electron injection currents flowing through the transport layers ( $L_h$  and  $L_e$ ), respectively. Under the steady-state condition,  $L_h = L_e \cong 40\text{nm}$  for device,  $j^h = j^e = j$ , and  $n_0$  can be obtained as following

$$n_0 = (2j/e\gamma L)^{1/2}$$

The electrons and holes in the recombination zone are free and equal to each other ( $n_h = n_e = n$ ), after turn off pulse, the charge decay can be expressed as

$$\frac{1}{n} = \frac{1}{n_0} + \gamma t$$

Taken into account EL yield,  $\phi_{EL} = \phi_{PL} P_S \gamma n(t)^2$ ,  $\phi_{PL}$  is PLQY,  $P_S$  is the function that excitons generated. The EL decay can be described as

$$\frac{1}{\sqrt{\phi_{EL}(t)}} = \frac{1}{\sqrt{\phi_{PL} P_S \gamma n_0^2}} + \sqrt{\frac{\gamma}{\phi_{PL} P_S}} t$$

and  $\gamma$  can be calculated as

$$\gamma = \left( \frac{(\gamma / \phi_{PL} P_S)^{0.5}}{(\phi_{PL} P_S \gamma n_0^2)^{-1/2}} \right)^2 eL / J$$

## Reference

1. L.-S. Cui, A. J. Gillett, S.-F. Zhang, H. Ye, Y. Liu, X.-K. Chen, Z.-S. Lin, E. W. Evans, W. K. Myers, T. K. Ronson, H. Nakanotani, S. Reineke, J.-L. Bredas, C. Adachi and R. H. Friend, *Nature Photonics*, 2020, **14**, 636-642.
2. Y. Fu, H. Liu, D. Yang, D. Ma, Z. Zhao and B. Z. Tang, *Science Advances*, **7**, eabj2504.
3. Y. Chen, Q. Sun, Y. Dai, D. Yang, X. Qiao and D. Ma, *Advanced Optical Materials*, 2019, **7**, 1900703.
